# Supplementary material
Source: MDPI journal article supplement (https://www.mdpi.com/2072-4292/15/16/3951)
Supplement: s1 [file s1 › remotesensing-2520274-SI.pdf]

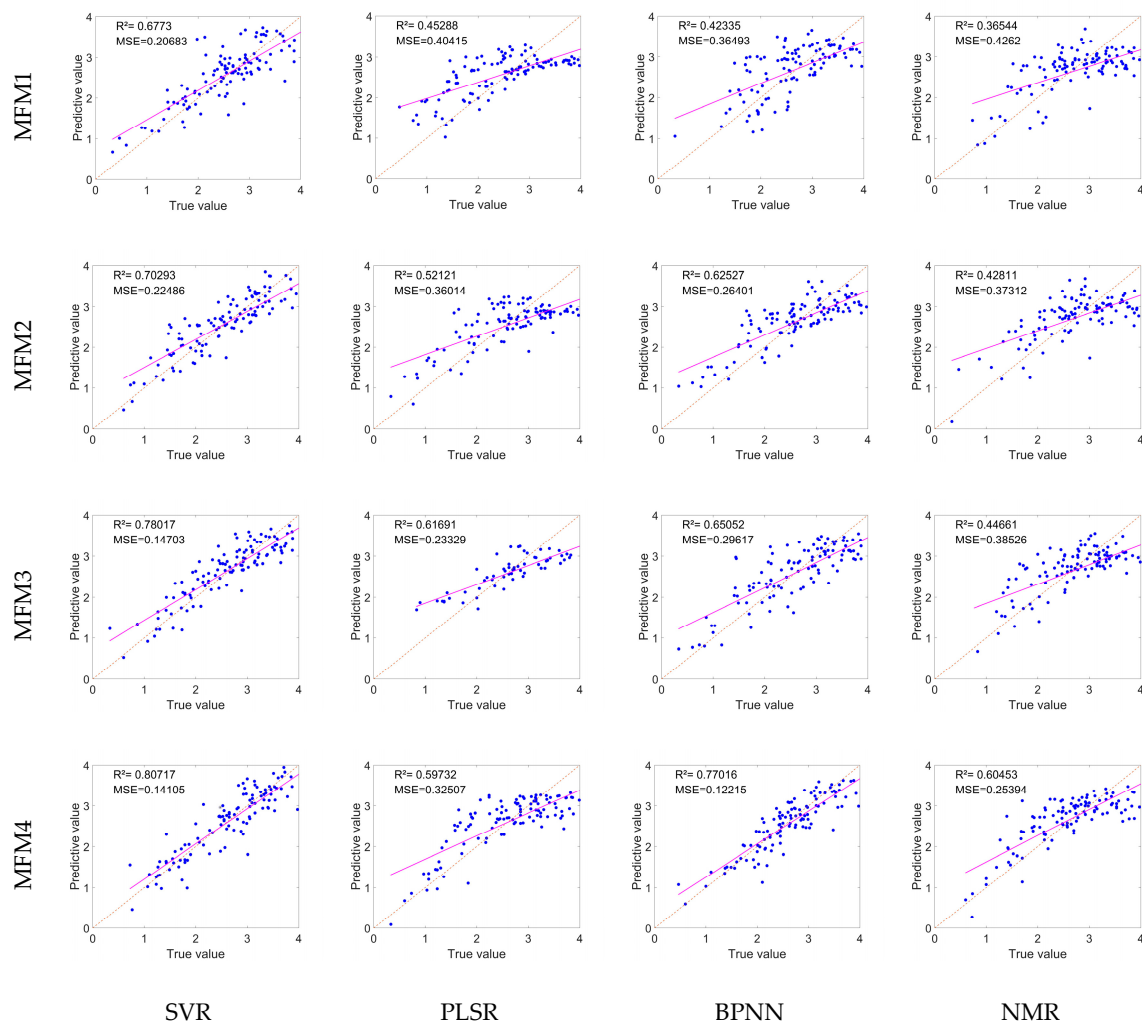

**Figure S1.** Prediction results of LAI for four multimodal models.

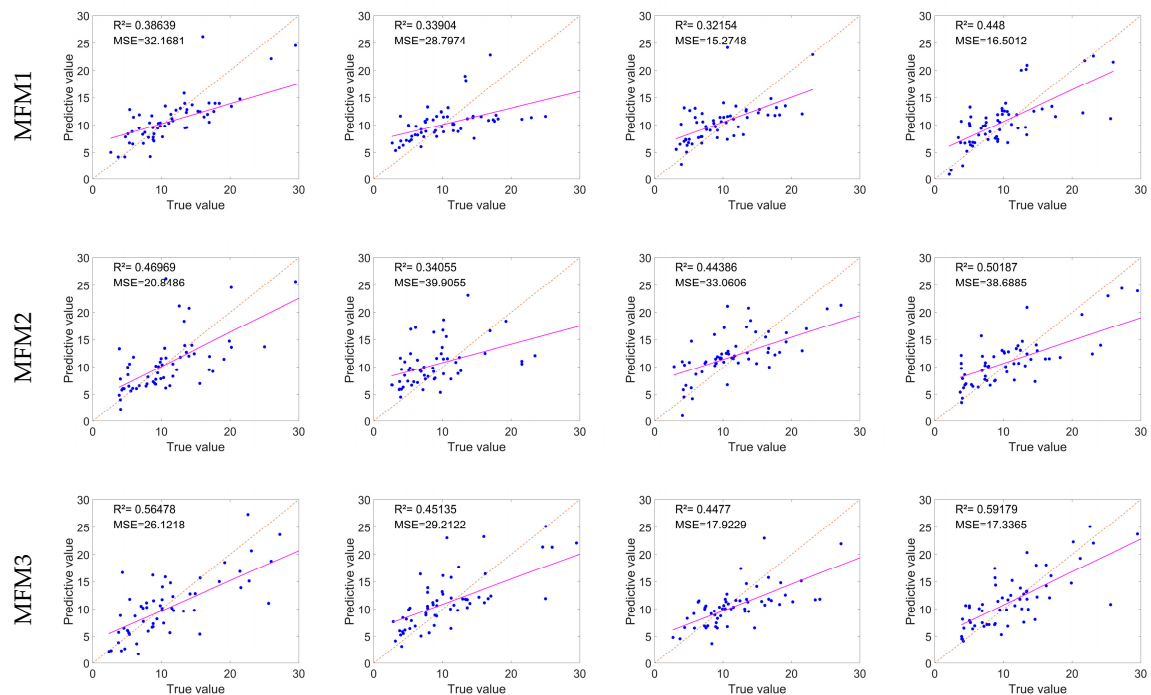

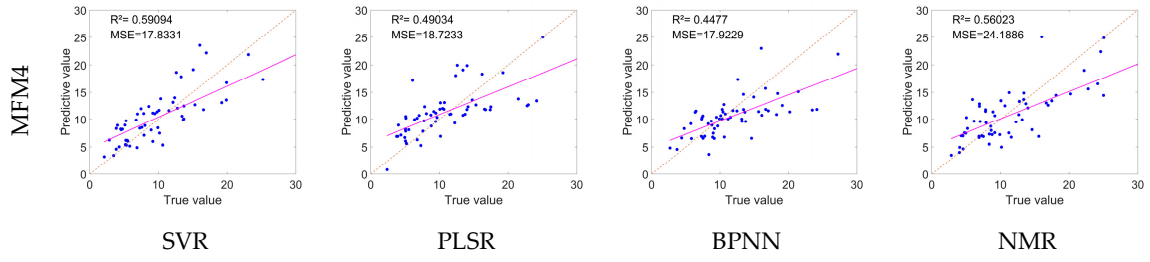

**Figure S2.** Prediction results of AGB for four multimodal models.

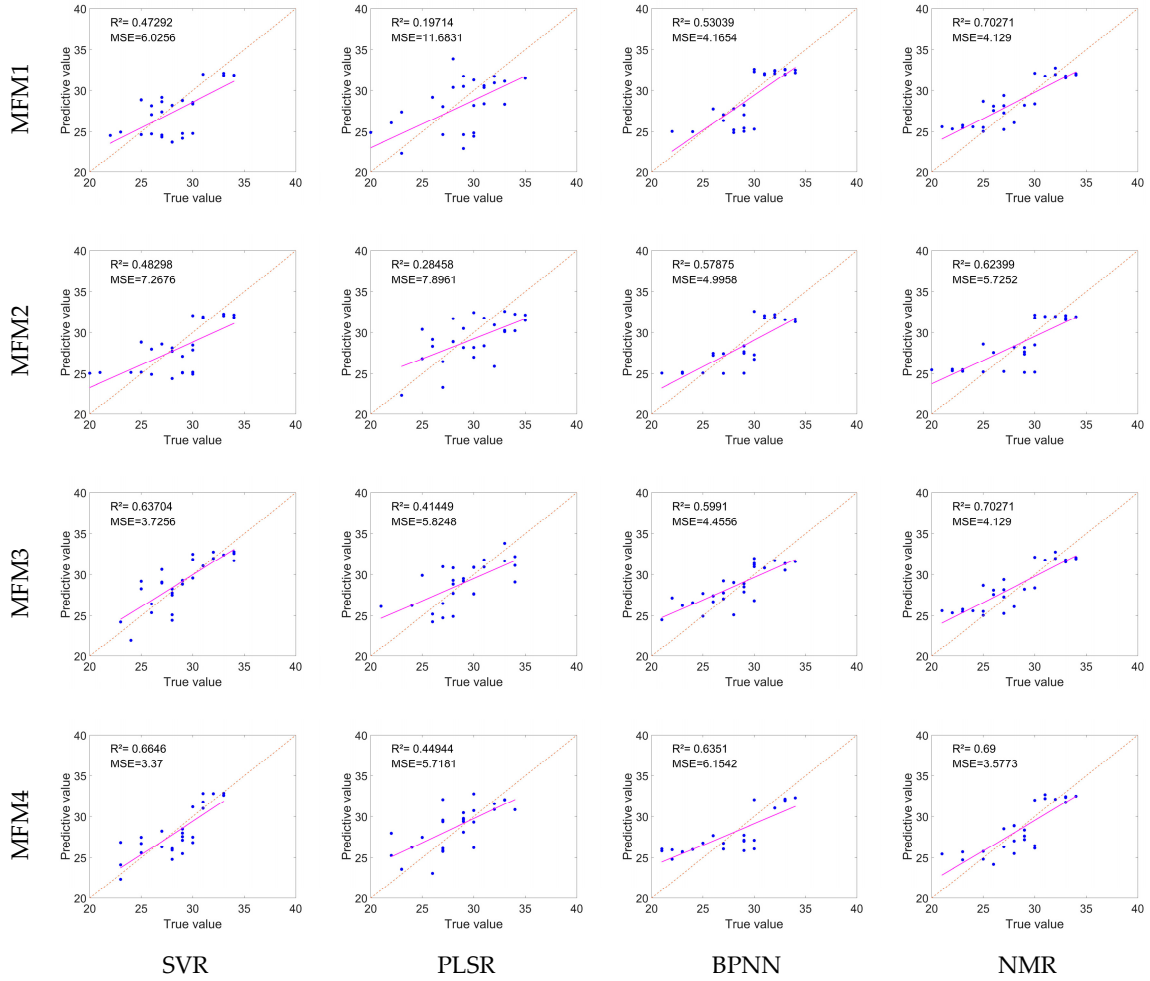

**Figure S3.** Prediction results of LNC for four multimodal models.

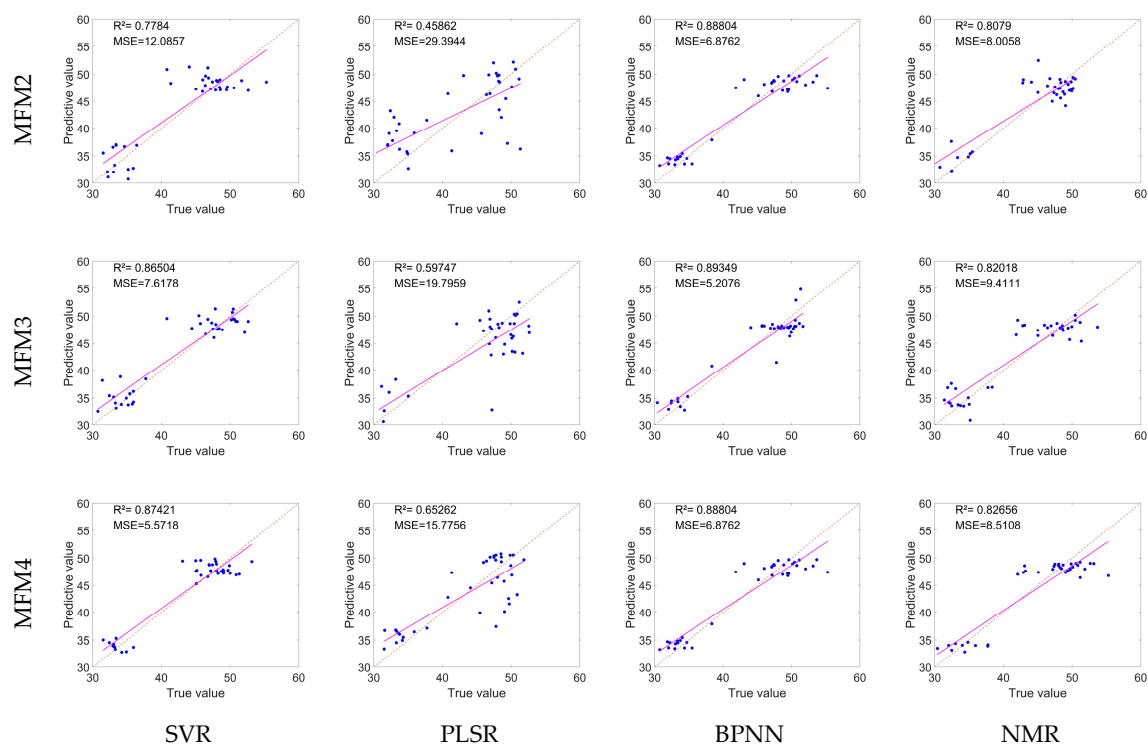

**Figure S4.** Prediction results of SPAD for four multimodal models.
